# Supplementary material
Source: Springer Nature journal article supplement (https://www.springermedizin.de/resource/supplementary/13019_2009_227_MOESM2_ESM.pdf/9638116)

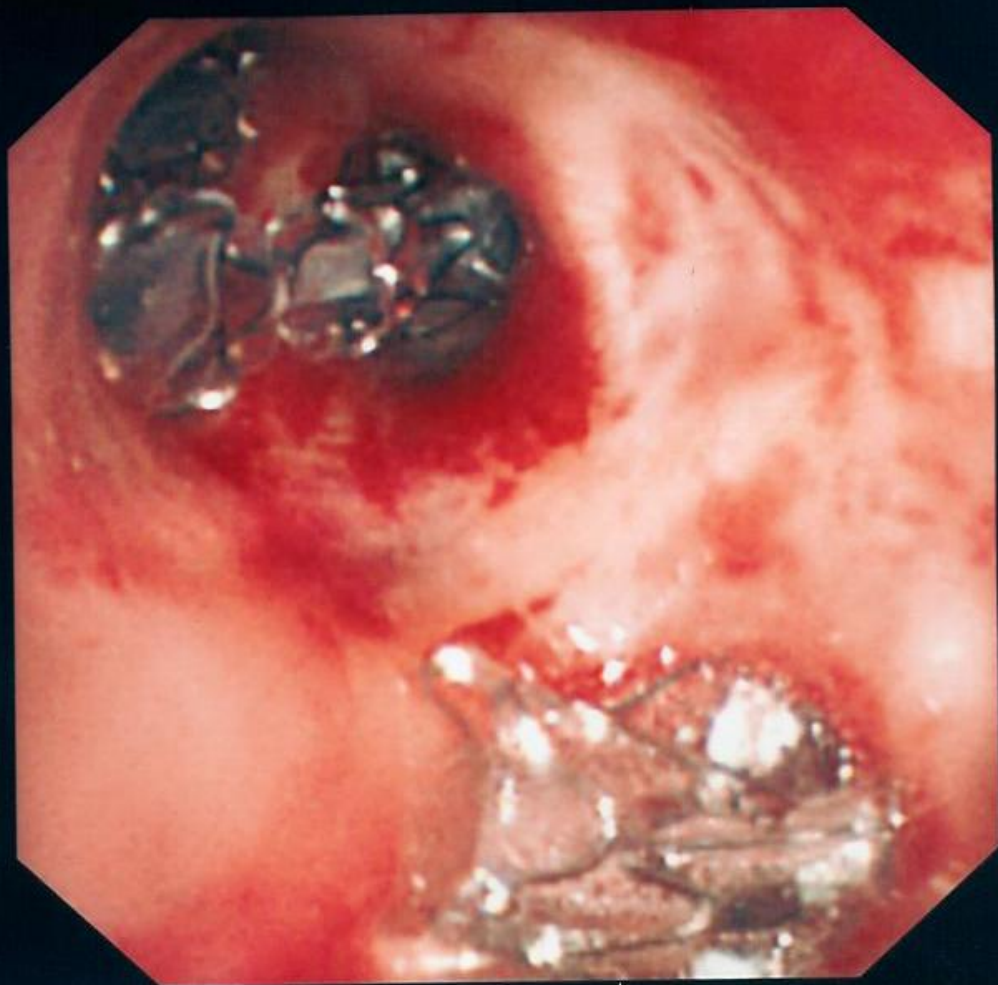

Supplement: MOESM2 [file 9638116]
